# Supplementary material
Source: HighWire-hosted journal article supplement (https://www.cmaj.ca/highwire/filestream/59769/field_highwire_adjunct_files/1/151447-res-2-at.pdf)
Supplement: 151447-res-2-at.pdf [file 151447-res-2-at.pdf]

## **Appendix 2 (as supplied by the authors): Generation of the final model**

|                          | <b>Bootstrap<br/>model</b> | <b>Remove MI</b> | <b>Remove previous<br/>heart surgery</b> | <b>Remove COPD</b> | <b>Remove obesity<br/>(final model)</b> |
|--------------------------|----------------------------|------------------|------------------------------------------|--------------------|-----------------------------------------|
| C statistic              | 0.8819                     | 0.8814           | 0.8812                                   | 0.8784             | 0.8744                                  |
| Hosmer-Lemeshow, p-value | 0.9402                     | 0.8595           | 0.7842                                   | 0.7649             | 0.7701                                  |
| IDI (p-value)            |                            | 0.0024(0.05)     | 0.0029(0.14)                             | 0.0005(0.73)       | 0.0008(0.65)                            |
